# Supplementary material for: Accurate and rapid prediction of tuberculosis drug resistance from genome sequence data using traditional machine learning algorithms and CNN
Source: PubMed Central journal article supplement (PMC8844416; doi:10.1038/s41598-022-06449-4), 2022-02-14
Supplement: 41598_2022_6449_MOESM1_ESM.pdf [file 41598_2022_6449_MOESM1_ESM.pdf]

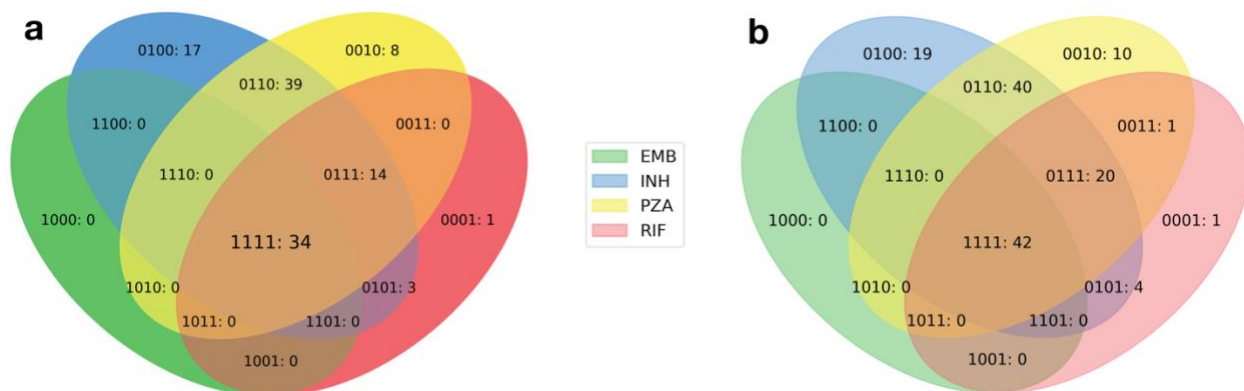

**Fig. S1.** Venn diagrams showing how the four sets of selected features overlap with each other. These features were selected for training 1D CNN models for the four first-line drugs. **a** Only variant features. **b** All types of features. These Venn diagrams were generated by using a python package called pyvenn (<https://github.com/tctianchi/pyvenn>)

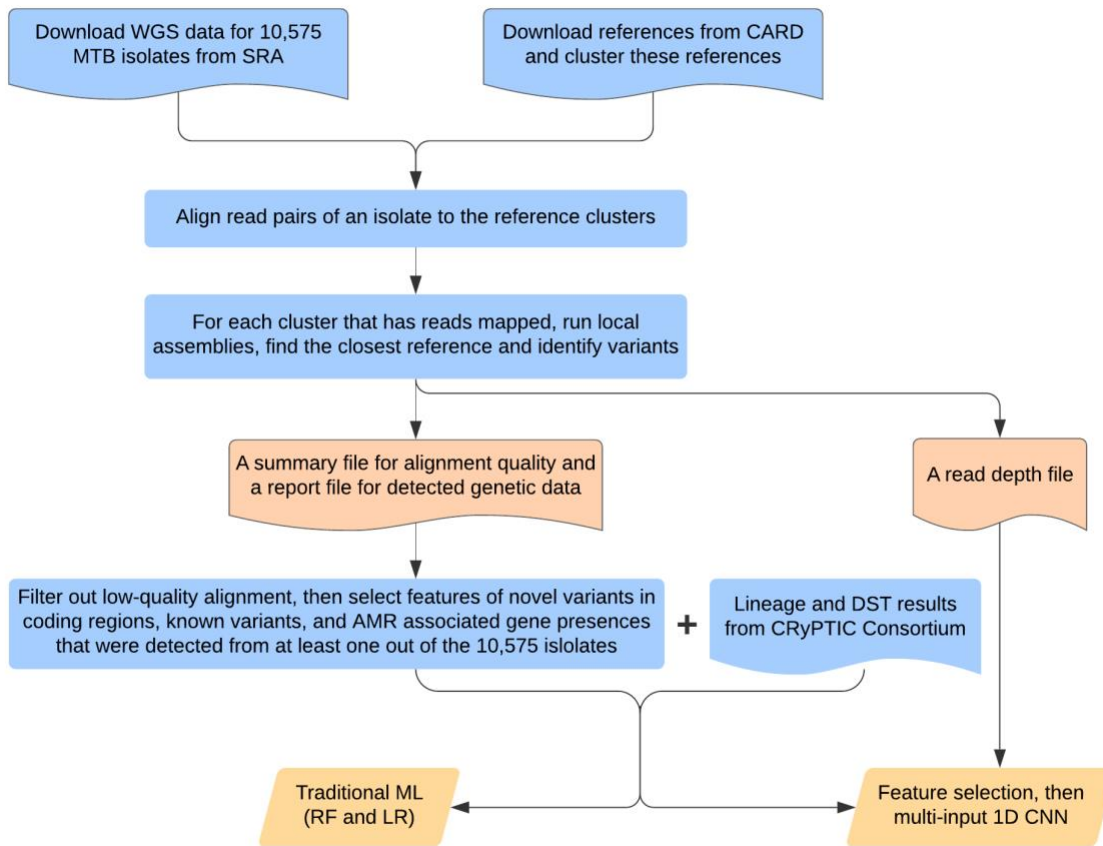

**Fig. S2.** Flowchart of our ML model development for MTB drug resistance classification.

**Table S1.** Selected variant features for 1D CNN model training of the eight (first-line and second-line) anti-TB drugs. Variants that are also in the list of AMR-associated TB mutations recently published by WHO are highlighted in bold.

| Drugs             | Selected variants                                                                                                                                                     | Covered by WHO (%) |
|-------------------|-----------------------------------------------------------------------------------------------------------------------------------------------------------------------|--------------------|
| <b>First-line</b> |                                                                                                                                                                       |                    |
| RIF               | <b>embB.D1024N</b><br><b>embB.G406A</b><br><b>embB.G406D</b><br><b>embB.G406S</b><br><b>embB.M306I</b><br><b>embB.M306L</b><br><b>embB.M306V</b><br><b>embB.Q497K</b> | 82.35%             |

|            |                                                                                                                                                                                                                                                                                                                                                                                                                                                                                                                                                                                                     |                |
|------------|-----------------------------------------------------------------------------------------------------------------------------------------------------------------------------------------------------------------------------------------------------------------------------------------------------------------------------------------------------------------------------------------------------------------------------------------------------------------------------------------------------------------------------------------------------------------------------------------------------|----------------|
|            | <b>embB.Q497R</b><br><b>embC.R738Q</b><br><b>embC.T270I</b><br><b>embC.V981L</b><br><b>gyrA.A90V</b><br><b>gyrA.D94A</b><br><b>gyrA.D94G</b><br><b>gyrA.D94N</b><br><b>gyrA.D94Y</b><br><b>gyrA.S91P</b><br><b>inhA.I194T</b><br><b>inhA.I21T</b><br><b>inhA.S94A</b><br><b>katG.R463L</b><br><b>katG.S315N</b><br><b>katG.S315T</b><br><b>rpoB.S450L</b><br><b>rpsL.K43R</b><br><b>rpsL.K88R</b><br><b>Mycobacterium_tuberculosis_16S.A1401G</b><br><b>katG.A234G</b><br><b>katG.G300W</b><br><b>katG.A431V</b><br><b>kasA.G269S</b><br><b>Mycobacterium_avium_23S.A2274G</b><br><b>gidB.A134E</b> |                |
| <b>EMB</b> | <b>embA.P913S</b><br><b>embB.D1024N</b><br><b>embB.D328G</b><br><b>embB.D328Y</b><br><b>embB.E378A</b><br><b>embB.G406A</b><br><b>embB.G406C</b><br><b>embB.G406D</b><br><b>embB.G406S</b><br><b>embB.M306I</b><br><b>embB.M306L</b><br><b>embB.M306V</b><br><b>embB.Q497K</b><br><b>embB.Q497R</b><br><b>embB.S297A</b><br><b>embB.Y319C</b><br><b>embB.Y334H</b><br><b>embC.N394D</b><br><b>embC.R738Q</b><br><b>embC.T270I</b>                                                                                                                                                                   | <b>79.44 %</b> |

|                                                                                                                                                                                                                                                                                                                                                                                                                                                                                                                                                                                                                                                                                       |  |
|---------------------------------------------------------------------------------------------------------------------------------------------------------------------------------------------------------------------------------------------------------------------------------------------------------------------------------------------------------------------------------------------------------------------------------------------------------------------------------------------------------------------------------------------------------------------------------------------------------------------------------------------------------------------------------------|--|
| <p>embC.V981L<br/>embR.C110Y<br/>ethA.A381P<br/>gyrA.A90V<br/>gyrA.D89G<br/>gyrA.D89N<br/>gyrA.D94A<br/>gyrA.D94G<br/>gyrA.D94N<br/>gyrA.D94Y<br/>gyrA.G88A<br/>gyrA.G88C<br/>gyrA.S91P<br/>inhA.I194T<br/>inhA.I21T<br/>inhA.I21V<br/>inhA.S94A<br/>katG.Q127P<br/>katG.R463L<br/>katG.S140N<br/>katG.S315G<br/>katG.S315I<br/>katG.S315N<br/>katG.S315T<br/>katG.Y337C<br/>ndh.R268H<br/>ndh.V18A<br/>pncA.A146T<br/>pncA.C14R<br/>pncA.D12A<br/>pncA.D12N<br/>pncA.D49A<br/>pncA.F58L<br/>pncA.G132S<br/>pncA.G97S<br/>pncA.H82R<br/>pncA.L172P<br/>pncA.L27P<br/>pncA.L4W<br/>pncA.L85P<br/>pncA.L85R<br/>pncA.M175V<br/>pncA.P54L<br/>pncA.Q10P<br/>pncA.Q10R<br/>pncA.Q141P</p> |  |
|---------------------------------------------------------------------------------------------------------------------------------------------------------------------------------------------------------------------------------------------------------------------------------------------------------------------------------------------------------------------------------------------------------------------------------------------------------------------------------------------------------------------------------------------------------------------------------------------------------------------------------------------------------------------------------------|--|

|     |                                                                                                                                                                                                                                                                                                                                                                                                                                                                                                                                                                                                                                                                                                                                                                                                                                                               |        |
|-----|---------------------------------------------------------------------------------------------------------------------------------------------------------------------------------------------------------------------------------------------------------------------------------------------------------------------------------------------------------------------------------------------------------------------------------------------------------------------------------------------------------------------------------------------------------------------------------------------------------------------------------------------------------------------------------------------------------------------------------------------------------------------------------------------------------------------------------------------------------------|--------|
|     | <p> <b>pncA.R154G</b><br/> <b>pncA.S67P</b><br/> <b>pncA.T135P</b><br/> <b>pncA.T160P</b><br/> <b>pncA.T47A</b><br/> <b>pncA.T76P</b><br/> <b>pncA.V139A</b><br/> <b>pncA.V155G</b><br/> <b>pncA.V7G</b><br/> <b>pncA.V9G</b><br/> <b>pncA.W68G</b><br/> <b>pncA.W68R</b><br/> <b>pncA.Y103H</b><br/> <b>rpoB.S450L</b><br/> <b>rpsL.K43R</b><br/> <b>rpsL.K88Q</b><br/> <b>rpsL.K88R</b><br/> <b>Mycobacterium_tuberculosis_16S.A1401G</b><br/> <b>tlyA.N236K</b><br/> katG.A234G<br/> katG.G300W<br/> katG.A431V<br/> rpoB.L511R<br/> rpoB.D516G<br/> rpoB.H526T<br/> kasA.G312S<br/> kasA.G269S<br/> thyA.T202A<br/> gidB.S70R<br/> <b>Mycobacterium_avium_23S.A2274G</b><br/> folC.A420V<br/> iniA.S501W<br/> gidB.P75S<br/> gidB.A134E<br/> folC.S150G<br/> gidB.A138E<br/> folC.I43S<br/> thyA.H207R<br/> gidB.H48Y<br/> folC.I43A<br/> katG.P131Q </p> |        |
| INH | <p> <b>embA.P913S</b><br/> <b>embB.D1024N</b><br/> <b>embB.D328Y</b><br/> <b>embB.E378A</b><br/> <b>embB.G406A</b> </p>                                                                                                                                                                                                                                                                                                                                                                                                                                                                                                                                                                                                                                                                                                                                       | 84.62% |

|                                                                                                                                                                                                                                                                                                                                                                                                                                                                                                                                                                                                                                                                                                                                                     |  |
|-----------------------------------------------------------------------------------------------------------------------------------------------------------------------------------------------------------------------------------------------------------------------------------------------------------------------------------------------------------------------------------------------------------------------------------------------------------------------------------------------------------------------------------------------------------------------------------------------------------------------------------------------------------------------------------------------------------------------------------------------------|--|
| <p>embB.G406C<br/>embB.G406D<br/>embB.G406S<br/>embB.M306I<br/>embB.M306L<br/>embB.M306V<br/>embB.Q497K<br/>embB.Q497R<br/>embC.N394D<br/>embC.R738Q<br/>embC.T270I<br/>embC.V981L<br/>embR.C110Y<br/>ethA.A381P<br/>gyrA.A90V<br/>gyrA.D94A<br/>gyrA.D94G<br/>gyrA.D94N<br/>gyrA.D94Y<br/>gyrA.G88A<br/>gyrA.S91P<br/>inhA.I194T<br/>inhA.I21T<br/>inhA.I21V<br/>inhA.S94A<br/>katG.G279D<br/>katG.Q127P<br/>katG.R463L<br/>katG.S315G<br/>katG.S315I<br/>katG.S315N<br/>katG.S315T<br/>ndh.R268H<br/>ndh.V18A<br/>pncA.H82R<br/>rpoB.S450L<br/>rpsL.K43R<br/>rpsL.K88R<br/>Mycobacterium_tuberculosis_16S.A1401G<br/>katG.A234G<br/>katG.G300W<br/>katG.A431V<br/>kasA.G269S<br/>thyA.T202A<br/>Mycobacterium_avium_23S.A2274G<br/>gidB.A134E</p> |  |
|-----------------------------------------------------------------------------------------------------------------------------------------------------------------------------------------------------------------------------------------------------------------------------------------------------------------------------------------------------------------------------------------------------------------------------------------------------------------------------------------------------------------------------------------------------------------------------------------------------------------------------------------------------------------------------------------------------------------------------------------------------|--|

|     |                                                                                                                                                                                                                                                                                                                                                                                                                                                                                                                                                                                                                                                                                                                                                                                                                                                                                                                     |        |
|-----|---------------------------------------------------------------------------------------------------------------------------------------------------------------------------------------------------------------------------------------------------------------------------------------------------------------------------------------------------------------------------------------------------------------------------------------------------------------------------------------------------------------------------------------------------------------------------------------------------------------------------------------------------------------------------------------------------------------------------------------------------------------------------------------------------------------------------------------------------------------------------------------------------------------------|--------|
|     | thyA.H207R                                                                                                                                                                                                                                                                                                                                                                                                                                                                                                                                                                                                                                                                                                                                                                                                                                                                                                          |        |
| PZA | <b>embA.P913S</b><br><b>embB.D1024N</b><br><b>embB.D328Y</b><br><b>embB.E378A</b><br><b>embB.G406A</b><br><b>embB.G406C</b><br><b>embB.G406D</b><br><b>embB.G406S</b><br><b>embB.M306I</b><br><b>embB.M306L</b><br><b>embB.M306V</b><br><b>embB.Q497K</b><br><b>embB.Q497R</b><br><b>embB.S297A</b><br><b>embB.Y319C</b><br><b>embB.Y334H</b><br><b>embC.N394D</b><br><b>embC.R738Q</b><br><b>embC.T270I</b><br><b>embC.V981L</b><br><b>embR.C110Y</b><br><b>ethA.A381P</b><br><b>ethA.D58A</b><br><b>gyrA.A90V</b><br><b>gyrA.D89G</b><br><b>gyrA.D94A</b><br><b>gyrA.D94G</b><br><b>gyrA.D94N</b><br><b>gyrA.D94Y</b><br><b>gyrA.G88A</b><br><b>gyrA.G88C</b><br><b>gyrA.S91P</b><br><b>inhA.I194T</b><br><b>inhA.I21T</b><br><b>inhA.I21V</b><br><b>inhA.S94A</b><br><b>katG.R463L</b><br><b>katG.S315N</b><br><b>katG.S315T</b><br><b>ndh.R268H</b><br><b>ndh.V18A</b><br><b>pncA.A134V</b><br><b>pncA.D12A</b> | 82.11% |

**pncA.D12N**  
**pncA.D49A**  
**pncA.F58L**  
**pncA.G132S**  
**pncA.H51Q**  
**pncA.H57D**  
**pncA.H82R**  
**pncA.L159R**  
**pncA.L172P**  
**pncA.L27P**  
**pncA.L4W**  
**pncA.L85P**  
**pncA.L85R**  
**pncA.M175V**  
**pncA.P54L**  
**pncA.Q10P**  
**pncA.Q10R**  
**pncA.Q141P**  
**pncA.S67P**  
**pncA.T135P**  
**pncA.T160P**  
**pncA.T76P**  
**pncA.V139A**  
**pncA.V139L**  
**pncA.V7G**  
**pncA.V9G**  
**pncA.W119R**  
**pncA.W68G**  
**pncA.W68R**  
**rpoB.S450L**  
**rpsL.K43R**  
**rpsL.K88Q**  
**rpsL.K88R**  
**Mycobacterium\_tuberculosis\_16S.A1401G**

**tlyA.N236K**  
katG.A234G  
katG.G300W  
katG.A431V  
kasA.G312S  
kasA.G269S  
thyA.T202A  
gidB.S70R  
Mycobacterium\_avium\_23S.A2274G  
folC.A420V  
iniA.S501W



|                    |                                                                                                                                                                                                                                                                                                                                                                                                                                                                                                                                                                                                                                                                      |         |
|--------------------|----------------------------------------------------------------------------------------------------------------------------------------------------------------------------------------------------------------------------------------------------------------------------------------------------------------------------------------------------------------------------------------------------------------------------------------------------------------------------------------------------------------------------------------------------------------------------------------------------------------------------------------------------------------------|---------|
|                    | folC.I43T<br>gidB.A134E<br>folC.S150G<br>gidB.A138E<br>folC.I43S<br>thyA.H207R<br>folC.I43A                                                                                                                                                                                                                                                                                                                                                                                                                                                                                                                                                                          |         |
| <b>Second-line</b> |                                                                                                                                                                                                                                                                                                                                                                                                                                                                                                                                                                                                                                                                      |         |
| AMK                | <b>katG.S315T</b><br><b>rpoB.S450L</b><br><b>rpsL.K43R</b><br><b>Mycobacterium_tuberculosis_16S.A1401G</b><br><b>embB.M306V</b>                                                                                                                                                                                                                                                                                                                                                                                                                                                                                                                                      | 100.00% |
| CM                 | <b>Mycobacterium_tuberculosis_16S.A1401G</b>                                                                                                                                                                                                                                                                                                                                                                                                                                                                                                                                                                                                                         | 100.00% |
| KM                 | <b>embA.P913S</b><br><b>embB.D1024N</b><br><b>embB.E378A</b><br><b>embB.G406D</b><br><b>embB.G406S</b><br><b>embB.M306I</b><br><b>embB.M306V</b><br><b>embB.Q497R</b><br><b>embC.N394D</b><br><b>embC.R738Q</b><br><b>embC.T270I</b><br><b>embC.V981L</b><br><b>embR.C110Y</b><br><b>gyrA.A90V</b><br><b>gyrA.D94G</b><br><b>gyrA.D94N</b><br><b>gyrA.D94Y</b><br><b>gyrA.S91P</b><br><b>katG.S315T</b><br><b>ndh.V18A</b><br><b>rpoB.S450L</b><br><b>rpsL.K43R</b><br><b>rpsL.K88R</b><br><b>Mycobacterium_tuberculosis_16S.A1401G</b><br><b>gyrB.V340L</b><br><b>thyA.T202A</b><br><b>kasA.G269S</b><br><b>folC.A420V</b><br><b>iniA.S501W</b><br><b>gidB.L79S</b> | 80.00%  |

|                       |                                                                                                                                                                                                                                                                                                                                                                                                                                                                                                                                                                                                           |         |
|-----------------------|-----------------------------------------------------------------------------------------------------------------------------------------------------------------------------------------------------------------------------------------------------------------------------------------------------------------------------------------------------------------------------------------------------------------------------------------------------------------------------------------------------------------------------------------------------------------------------------------------------------|---------|
| OFX                   | katG.S315T<br>gyrA.A90V<br>gyrA.D94G                                                                                                                                                                                                                                                                                                                                                                                                                                                                                                                                                                      | 100.00% |
| Nonredundant<br>Union | embA.P913S<br>embB.D1024N<br>embB.D328G<br>embB.D328Y<br>embB.E378A<br>embB.G406A<br>embB.G406C<br>embB.G406D<br>embB.G406S<br>embB.M306I<br>embB.M306L<br>embB.M306V<br>embB.Q497K<br>embB.Q497R<br>embB.S297A<br>embB.Y319C<br>embB.Y334H<br>embC.N394D<br>embC.R738Q<br>embC.T270I<br>embC.V981L<br>embR.C110Y<br>ethA.A381P<br>ethA.D58A<br>gyrA.A90V<br>gyrA.D89G<br>gyrA.D89N<br>gyrA.D94A<br>gyrA.D94G<br>gyrA.D94N<br>gyrA.D94Y<br>gyrA.G88A<br>gyrA.G88C<br>gyrA.S91P<br>inhA.I194T<br>inhA.I21T<br>inhA.I21V<br>inhA.S94A<br>katG.G279D<br>katG.Q127P<br>katG.R463L<br>katG.S140N<br>katG.S315G | 78.81%  |

|                                                                                                                                                                                                                                                                                                                                                                                                                                                                                                                                                                                                                                                                                                                                                                                                                                                                                                                                                                                                                          |  |
|--------------------------------------------------------------------------------------------------------------------------------------------------------------------------------------------------------------------------------------------------------------------------------------------------------------------------------------------------------------------------------------------------------------------------------------------------------------------------------------------------------------------------------------------------------------------------------------------------------------------------------------------------------------------------------------------------------------------------------------------------------------------------------------------------------------------------------------------------------------------------------------------------------------------------------------------------------------------------------------------------------------------------|--|
| <p><b>katG.S315I</b><br/><b>katG.S315N</b><br/><b>katG.S315T</b><br/><b>katG.Y337C</b><br/><b>ndh.R268H</b><br/><b>ndh.V18A</b><br/><b>pncA.A134V</b><br/><b>pncA.A146T</b><br/><b>pncA.C14R</b><br/><b>pncA.D12A</b><br/><b>pncA.D12N</b><br/><b>pncA.D49A</b><br/><b>pncA.F58L</b><br/><b>pncA.G132S</b><br/><b>pncA.G97S</b><br/><b>pncA.H51Q</b><br/><b>pncA.H57D</b><br/><b>pncA.H82R</b><br/><b>pncA.L159R</b><br/><b>pncA.L172P</b><br/><b>pncA.L27P</b><br/><b>pncA.L4W</b><br/><b>pncA.L85P</b><br/><b>pncA.L85R</b><br/><b>pncA.M175V</b><br/><b>pncA.P54L</b><br/><b>pncA.Q10P</b><br/><b>pncA.Q10R</b><br/><b>pncA.Q141P</b><br/><b>pncA.R154G</b><br/><b>pncA.S67P</b><br/><b>pncA.T135P</b><br/><b>pncA.T160P</b><br/><b>pncA.T47A</b><br/><b>pncA.T76P</b><br/><b>pncA.V139A</b><br/><b>pncA.V139L</b><br/><b>pncA.V155G</b><br/><b>pncA.V7G</b><br/><b>pncA.V9G</b><br/><b>pncA.W119R</b><br/><b>pncA.W68G</b><br/><b>pncA.W68R</b><br/><b>pncA.Y103H</b><br/><b>rpoB.S450L</b><br/><b>rpsL.K43R</b></p> |  |
|--------------------------------------------------------------------------------------------------------------------------------------------------------------------------------------------------------------------------------------------------------------------------------------------------------------------------------------------------------------------------------------------------------------------------------------------------------------------------------------------------------------------------------------------------------------------------------------------------------------------------------------------------------------------------------------------------------------------------------------------------------------------------------------------------------------------------------------------------------------------------------------------------------------------------------------------------------------------------------------------------------------------------|--|

|                                                                                                                                                                                                                                                                                                                                                                                                                                                                                                                         |  |
|-------------------------------------------------------------------------------------------------------------------------------------------------------------------------------------------------------------------------------------------------------------------------------------------------------------------------------------------------------------------------------------------------------------------------------------------------------------------------------------------------------------------------|--|
| <p><b>rpsL.K88Q</b><br/><b>rpsL.K88R</b><br/><b>Mycobacterium_tuberculosis_16S.A1401G</b><br/><b>tlyA.N236K</b><br/>Mycobacterium_avium_23S.A2274G<br/>folC.A420V<br/>folC.I43A<br/>folC.I43S<br/>folC.I43T<br/>folC.S150G<br/>gidB.A134E<br/>gidB.A138E<br/>gidB.H48Y<br/>gidB.L79S<br/>gidB.P75S<br/>gidB.S70R<br/>gyrB.V340L<br/>iniA.S501W<br/>kasA.G269S<br/>kasA.G312S<br/>katG.A234G<br/>katG.A431V<br/>katG.G300W<br/>katG.P131Q<br/>rpoB.D516G<br/>rpoB.H526T<br/>rpoB.L511R<br/>thyA.H207R<br/>thyA.T202A</p> |  |
|-------------------------------------------------------------------------------------------------------------------------------------------------------------------------------------------------------------------------------------------------------------------------------------------------------------------------------------------------------------------------------------------------------------------------------------------------------------------------------------------------------------------------|--|
